# Supplementary material
Source: PubMed Central journal article supplement (PMC3160270)

## Supporting Information:

### Figure Legends

**Figure S1.** HPLC-UV chromatogram illustrates the separation of the four synthetic stereoisomer adducts derived from the incubation of ( $\pm$ )-*anti*-DB[*a,l*]PDE with dA.

**Figure S2.** (A). MS/MS fragmentation of *anti*-DB[*a,l*]PDE-dA adduct at positive mode.

(B). MS/MS fragmentation of *anti*-DB[*a,l*]PDE-[<sup>15</sup>N<sub>5</sub>]-dA standard adduct (the asterisks indicate the <sup>15</sup>N-labeled sites).

**Figure S3.** CD spectra of ( $\pm$ )-*anti-cis*- and ( $\pm$ )-*anti-trans*-DB[*a,l*]PDE-dA adducts.

Figure S1.

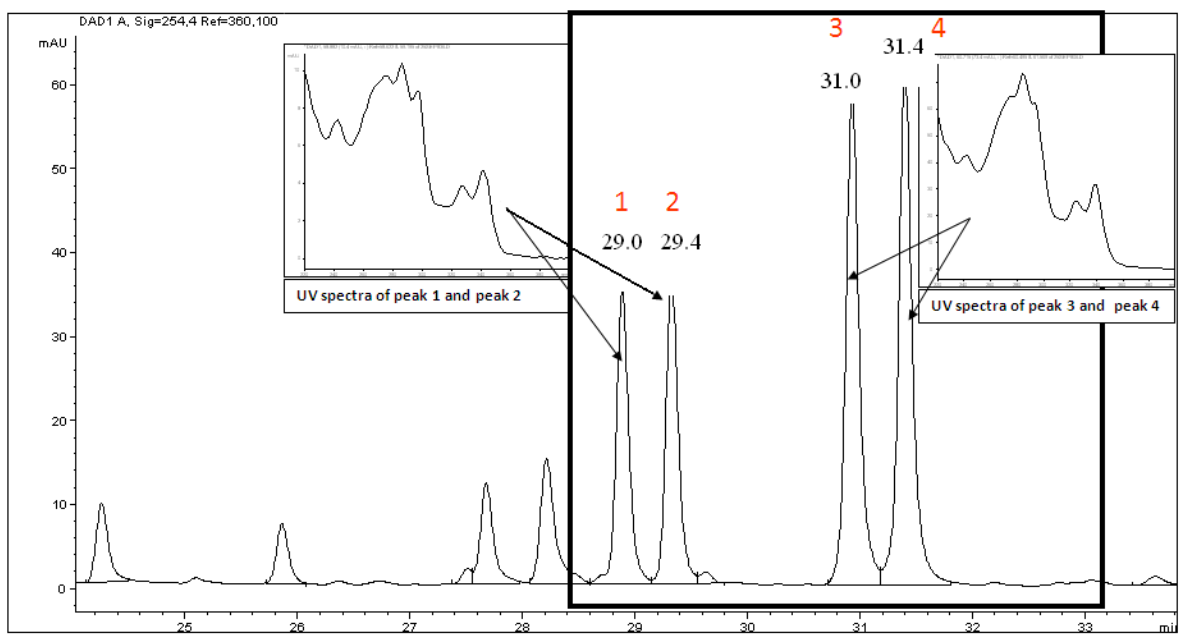

Figure S2

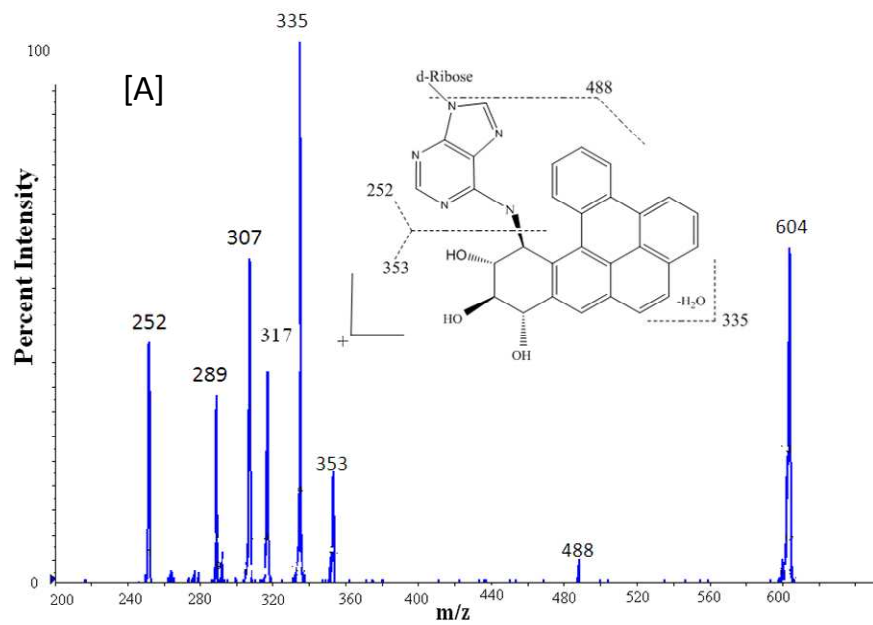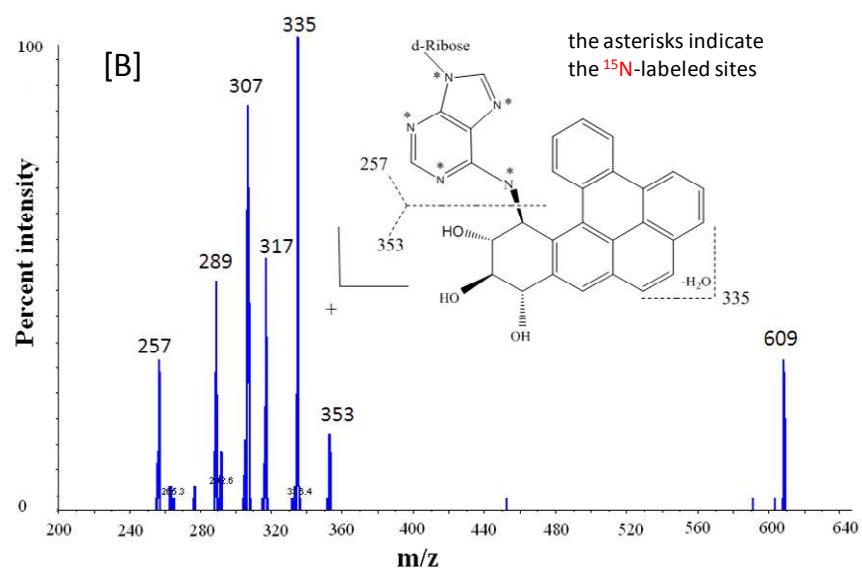

**Figure S3**

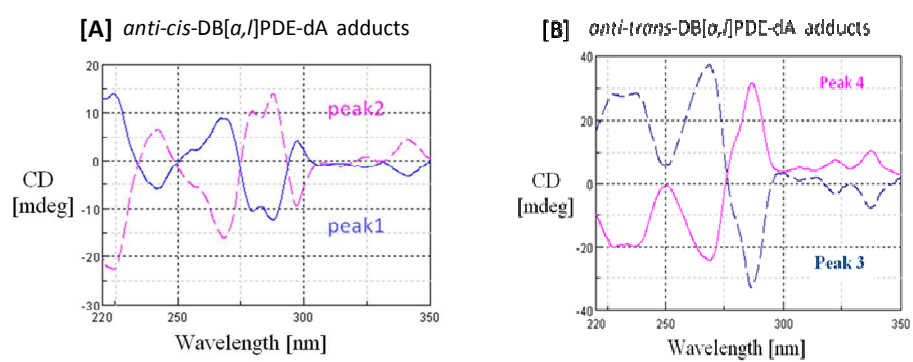

Supplement: NIHMS312845-supplement-1_si_001.pdf [file NIHMS312845-supplement-1_si_001.pdf]
